# Supplementary material
Source: HighWire-hosted journal article supplement (https://jme.bmj.com/content/medethics-2015-103347)

## Appendix

Diagram 1: Literature search sources for social science literature on biofabrication undertaken in March-June 2016

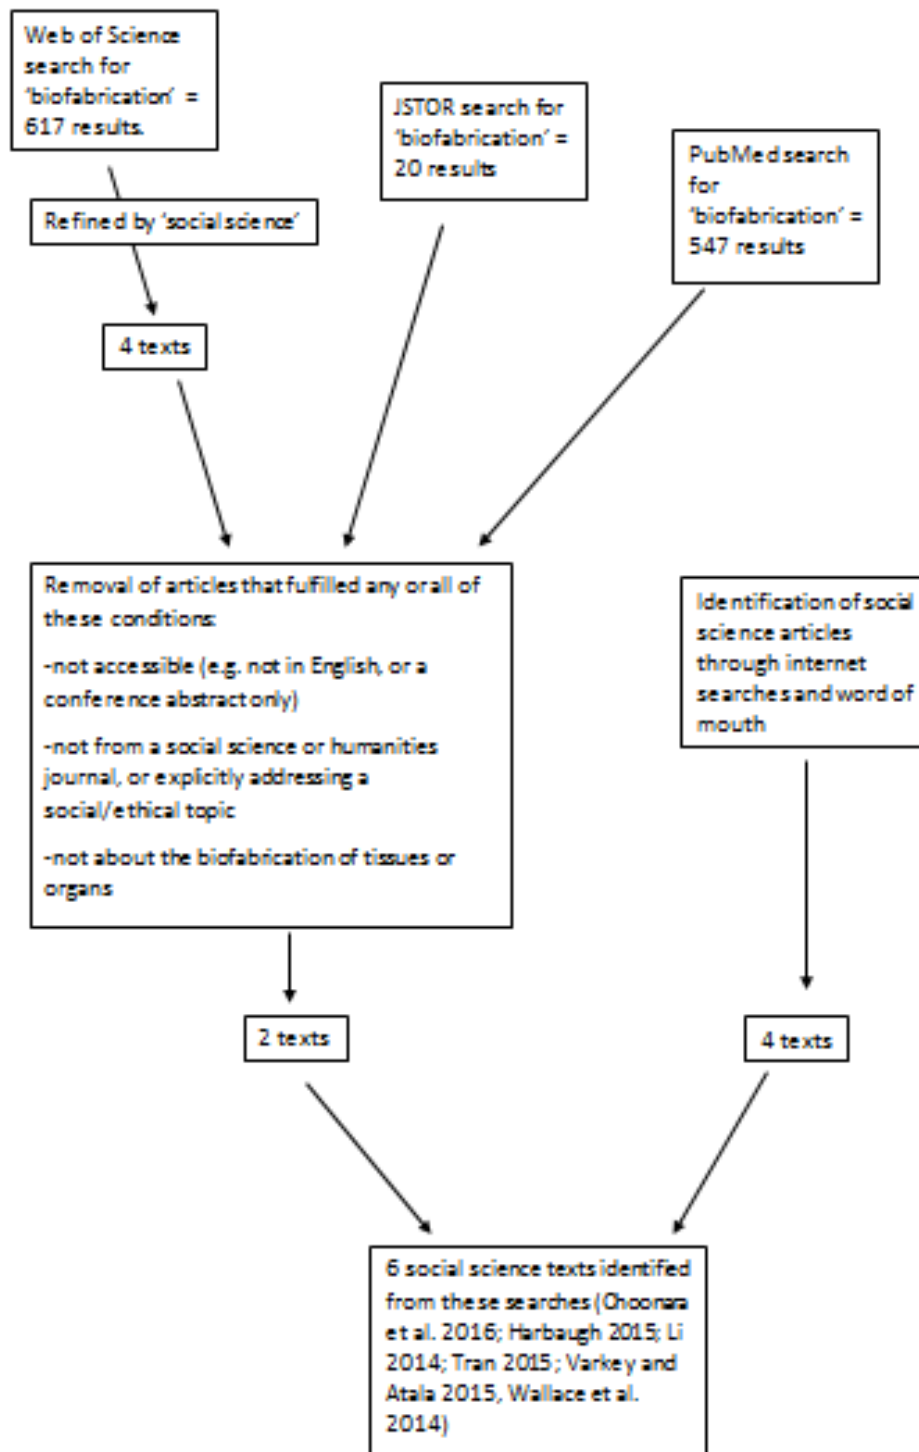

Supplement: inline-supplementary-material-1 [file inline-supplementary-material-1.pdf]
